# Supplementary material for: Exploring the heterointerface of silver nanoparticles and cobalt oxide nanorings toward the oxygen reduction reaction
Source: Royal Society of Chemistry journal article supplement (doi:10.1039/d5ta01457c), 2025-01-01
Supplement: d5ta01457c1.pdf [file d5ta01457c1.pdf]

## Supplementary Information

### Exploring the heterointerface of silver nanoparticle and cobalt oxide nanoring toward oxygen reduction reaction

Fatima Nasim<sup>1</sup>, Hira Malik<sup>1</sup>, Huilong Dong, and Muhammad Arif Nadeem<sup>1,2</sup>

<sup>1</sup>Catalysis and Nanomaterials Lab 27, Department of Chemistry, Quaid-i-Azam University, Islamabad 45320, Pakistan

<sup>2</sup>Pakistan Academy of Sciences, 3-Constitution Avenue Sector G-5/2, Islamabad, Pakistan.

\*Contact details:

M.A.N; manadeem@qau.edu.pk

H. D : hldong@szut.edu.cn; huilong\_dong@126.com

#### Average crystallite size by using Debye-Scherrer equation

The crystallite size of the crystalline materials was estimated from X-ray diffraction patterns using the Debye-Scherrer equation.

$$D = K\lambda / \beta \cos\theta$$

The Scherrer constant (K) was taken as 0.89, and the wavelength ( $\lambda$ ) of the X-ray was determined by the X-ray source, which was Cu K $\alpha$  radiation with a wavelength of 1.5406 Å. The FWHM ( $\beta$ ) in radians was measured by determining the diffraction peak width at half of its maximum intensity, and the Bragg angle ( $\theta$ ) was obtained from the XRD pattern by locating the position of the diffraction peak.

**Table S1:** Crystallite size calculations of the synthesized materials

| Materials                                                | Xc    | FWHM ( $\beta$ )<br>(degree) | D (nm) | Avg. Size<br>(nm) |
|----------------------------------------------------------|-------|------------------------------|--------|-------------------|
| <b>Co<sub>3</sub>O<sub>4</sub></b>                       | 19.02 | 0.20203                      | 41.66  | <b>34.2</b>       |
|                                                          | 31.21 | 0.22312                      | 38.63  |                   |
|                                                          | 36.75 | 0.27953                      | 31.29  |                   |
|                                                          | 59.37 | 0.37749                      | 25.31  |                   |
| <b>Ag/Co<sub>3</sub>O<sub>4</sub></b>                    | 19.02 | 0.24101                      | 34.92  | <b>30.7</b>       |
|                                                          | 31.21 | 0.22634                      | 38.08  |                   |
|                                                          | 36.75 | 0.30368                      | 28.80  |                   |
|                                                          | 59.37 | 0.45363                      | 21.06  |                   |
| <b>Ag<sub>0.9</sub>-Co<sub>3</sub>O<sub>4</sub>/NCNS</b> | 19.02 | 0.86593                      | 9.72   | <b>9.5</b>        |
|                                                          | 31.21 | 0.80938                      | 10.65  |                   |
|                                                          | 36.75 | 1.15051                      | 7.60   |                   |
|                                                          | 59.37 | 0.94389                      | 10.12  |                   |

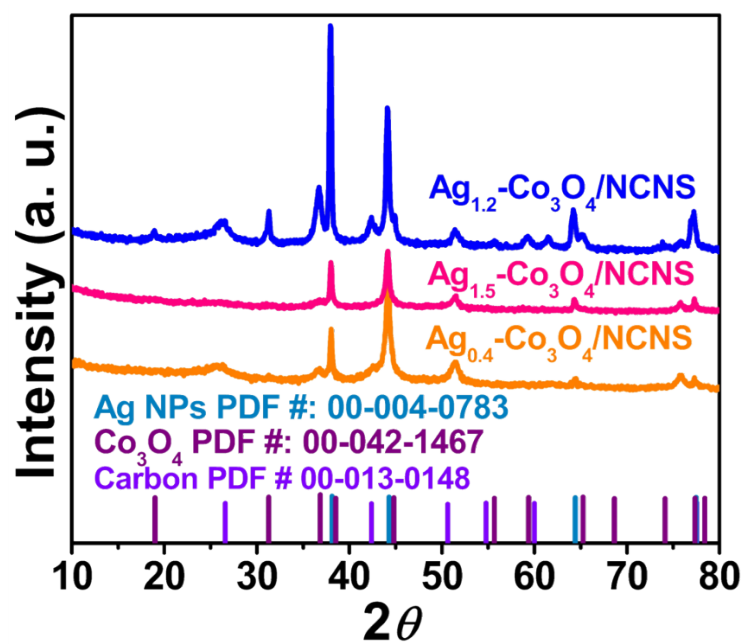

Figure S1: PXRD of all the silver-based catalysts

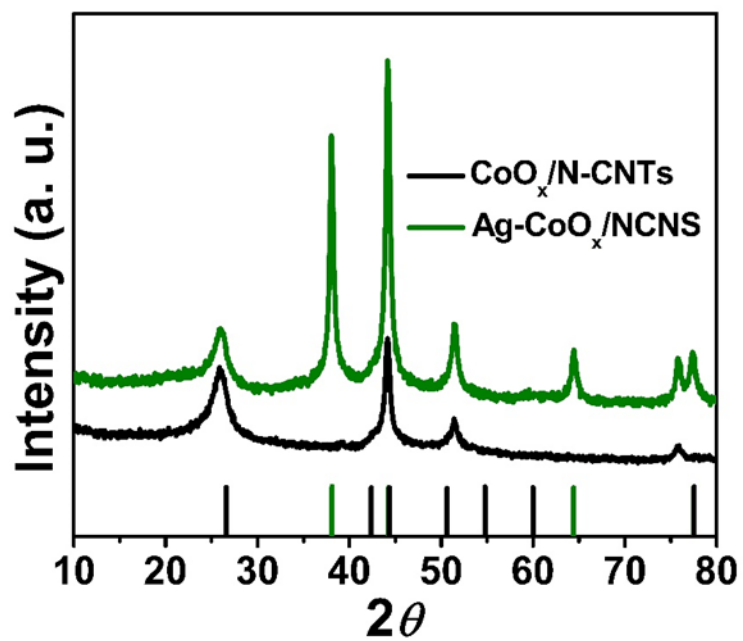

Figure S2: PXRD of  $\text{CoO}_x/\text{N-CNTs}$  and  $\text{Ag-CoO}_x/\text{NCNS}$

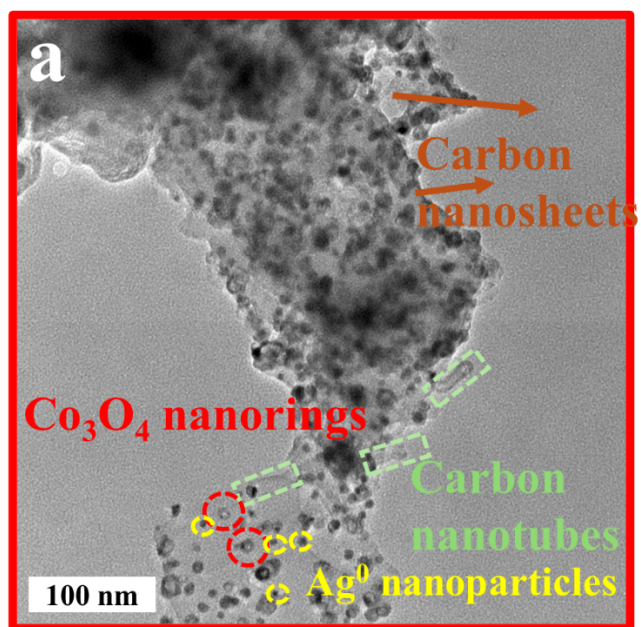

**Figure S3:** HRTEM analysis of  $\text{Ag}_{0.9}\text{-Co}_3\text{O}_4/\text{NCNS}$  at 100 nm

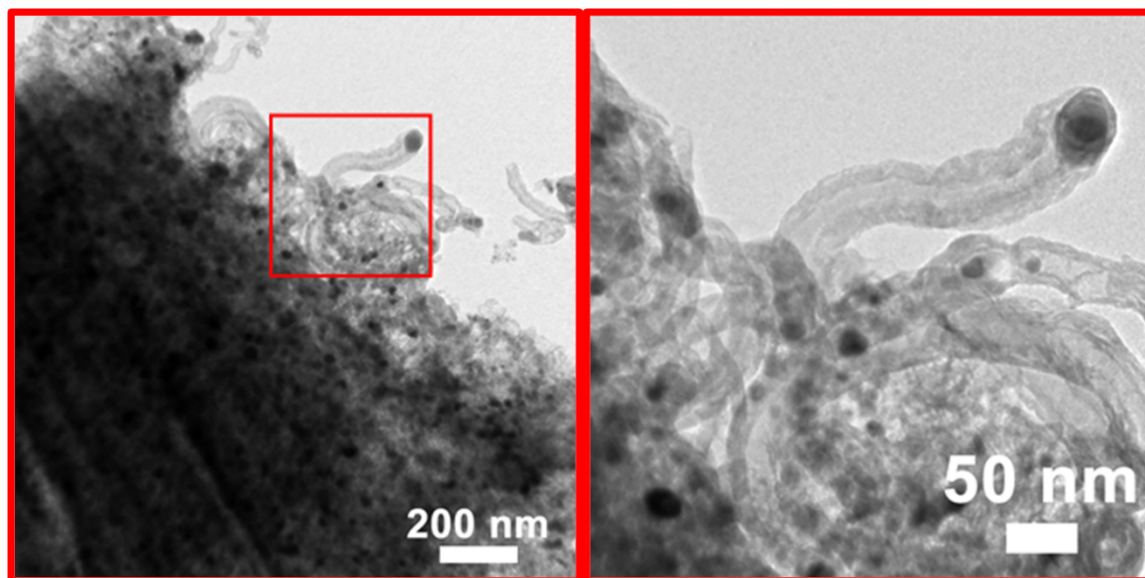

**Figure S4:** HRTEM of  $\text{CoO}_x/\text{-N-CNTs}$  at different resolutions<sup>1</sup>

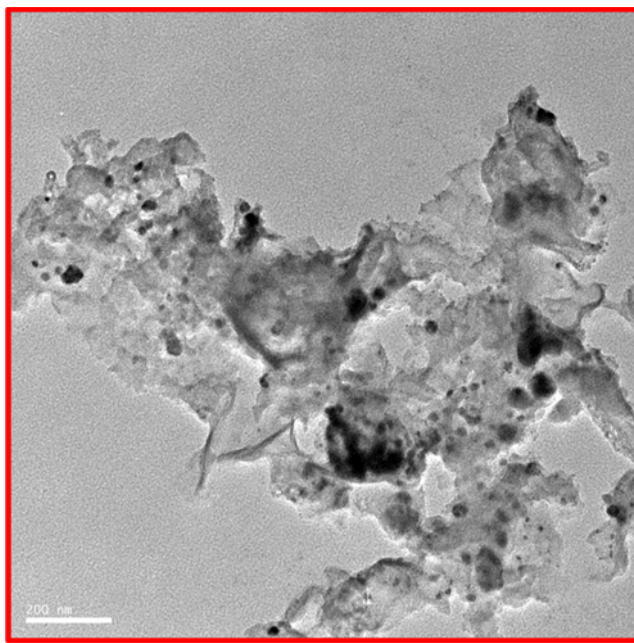

**Figure S5:** HRTEM of Ag-CoO<sub>x</sub>/NCNS at 200 nm

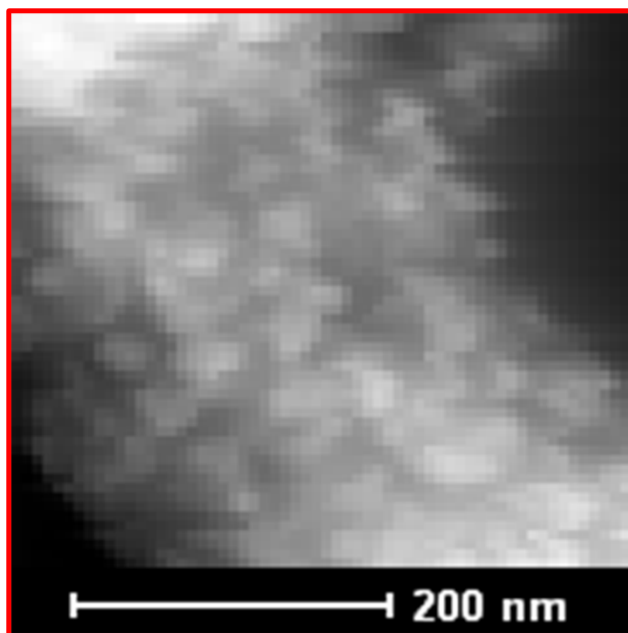

**Figure S6:** HAADF-STEM analysis of Ag<sub>0.9</sub>-CO<sub>3</sub>O<sub>4</sub>/NCNS

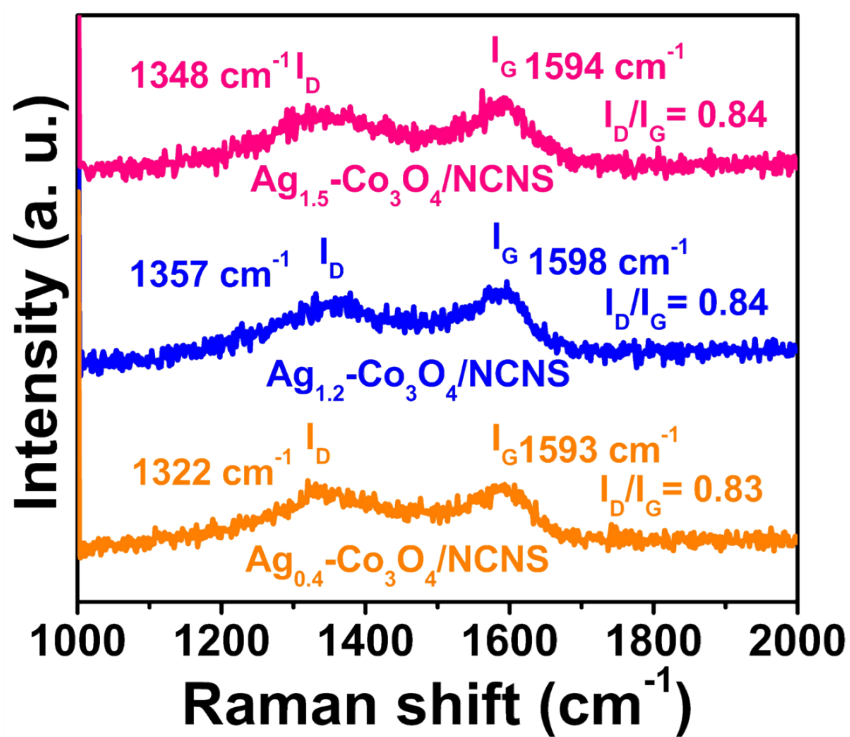

**Figure S7:** Raman analysis of  $\text{Ag}_{0.4}\text{-Co}_3\text{O}_4/\text{NCNS}$ ,  $\text{Ag}_{1.2}\text{-Co}_3\text{O}_4/\text{NCNS}$ , and  $\text{Ag}_{1.5}\text{-Co}_3\text{O}_4/\text{NCNS}$ .

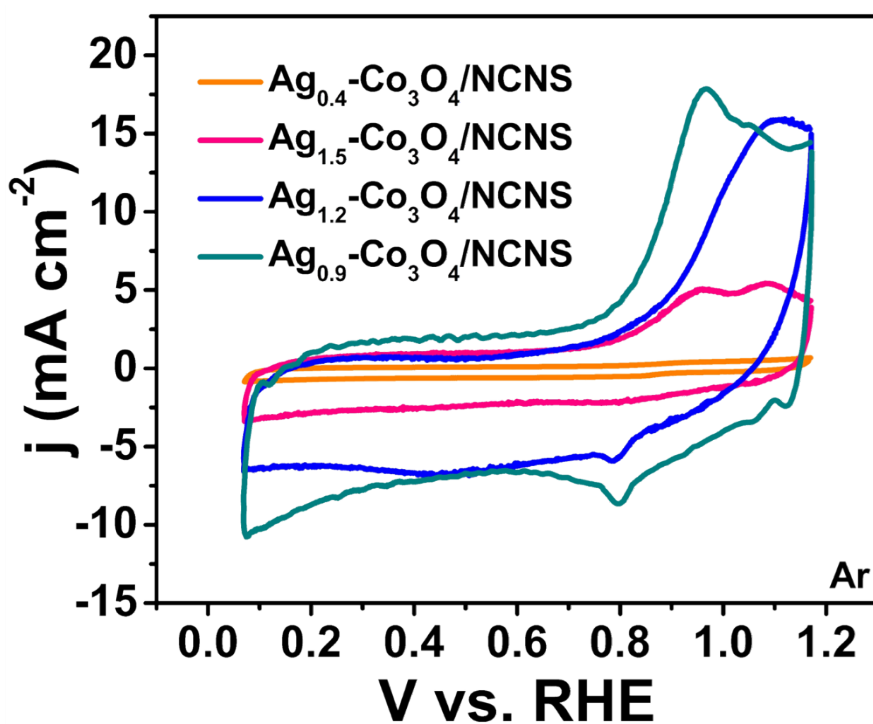

**Figure S8:** CV cycles of  $\text{Ag}_{0.4}\text{-Co}_3\text{O}_4/\text{NCNS}$ ,  $\text{Ag}_{1.2}\text{-Co}_3\text{O}_4/\text{NCNS}$ , and  $\text{Ag}_{1.5}\text{-Co}_3\text{O}_4/\text{NCNS}$  in Ar saturated environment.

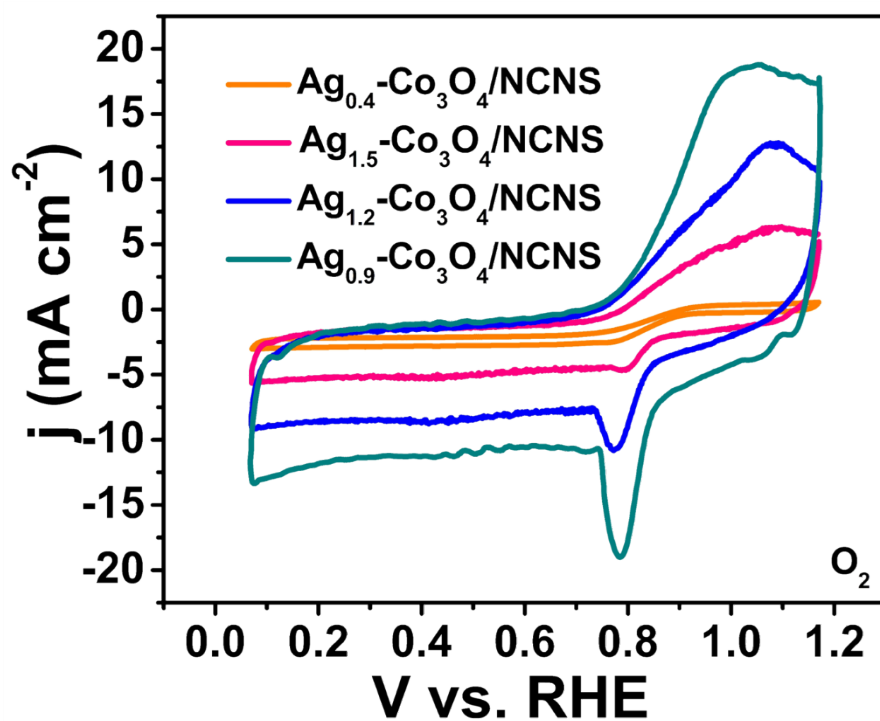

**Figure S9:** CV cycles of Ag<sub>0.4</sub>-Co<sub>3</sub>O<sub>4</sub>/NCNS, Ag<sub>1.2</sub>-Co<sub>3</sub>O<sub>4</sub>/NCNS, and Ag<sub>1.5</sub>-Co<sub>3</sub>O<sub>4</sub>/NCNS in O<sub>2</sub> saturated environment.

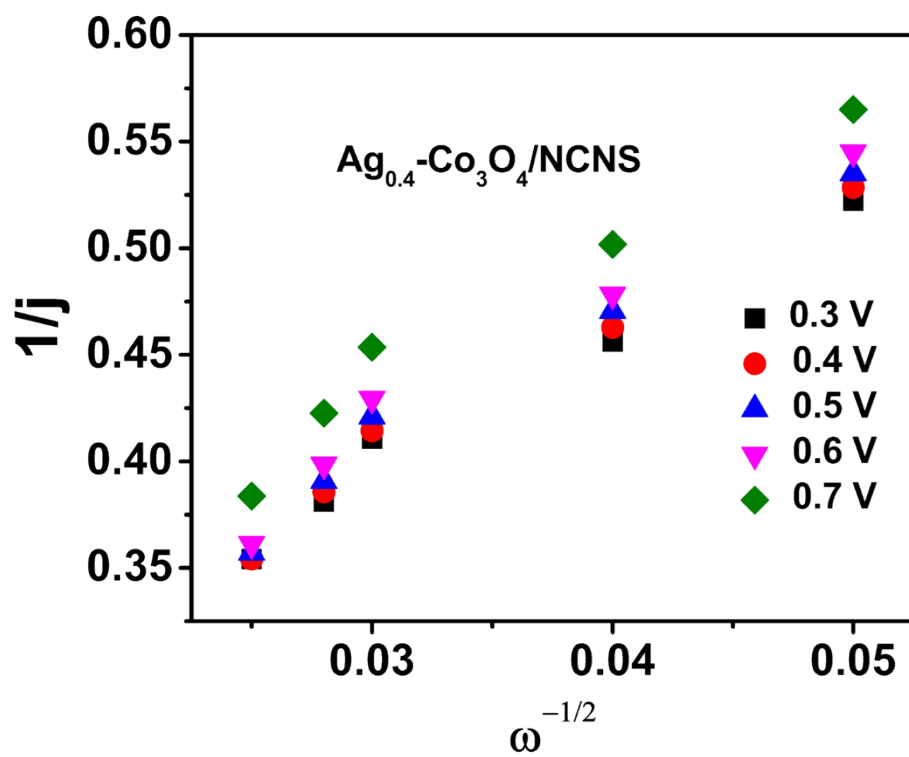

**Figure S10:** Electron count of  $\text{Ag}_{0.4}\text{-Co}_3\text{O}_4/\text{NCNS}$ .



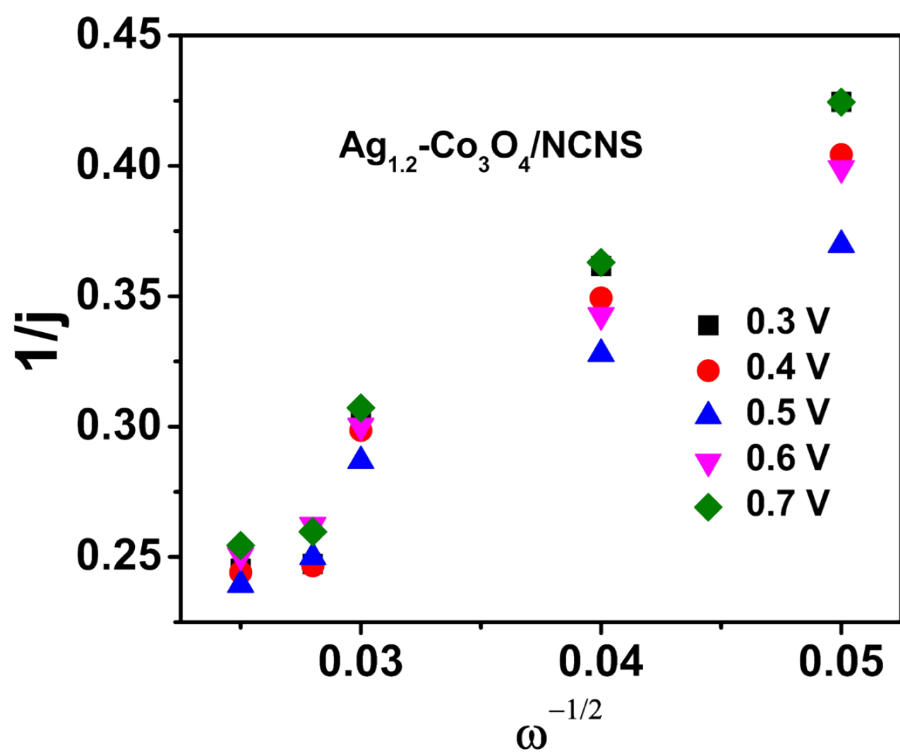

Figure S11: Electron count of  $\text{Ag}_{1.2}\text{-Co}_3\text{O}_4/\text{NCNS}$ .

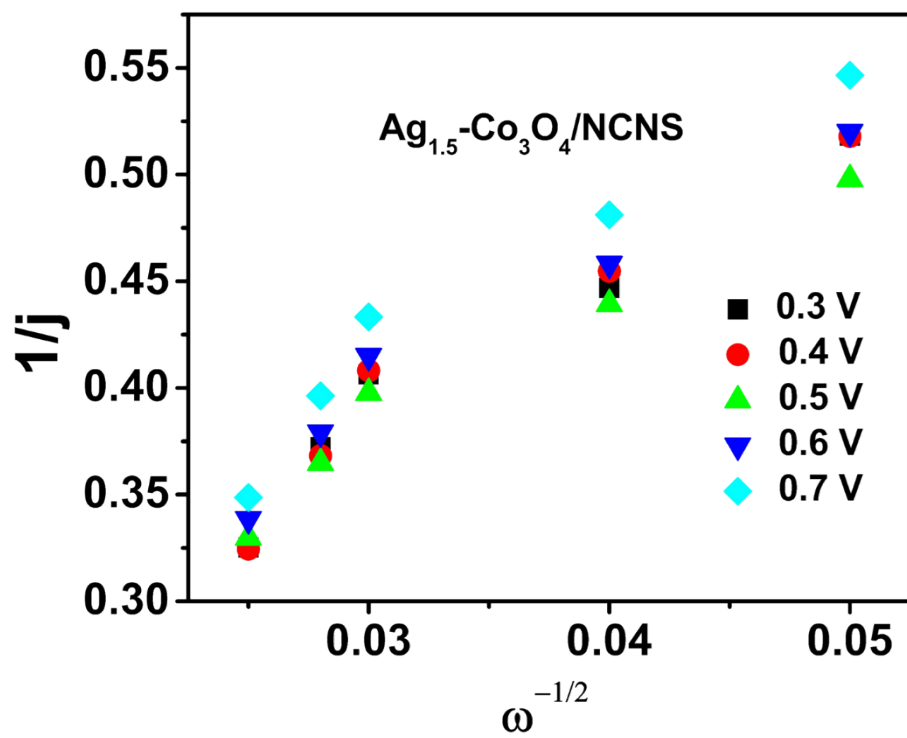

Figure S12: Electron count of  $\text{Ag}_{1.5}\text{-Co}_3\text{O}_4/\text{NCNS}$ .

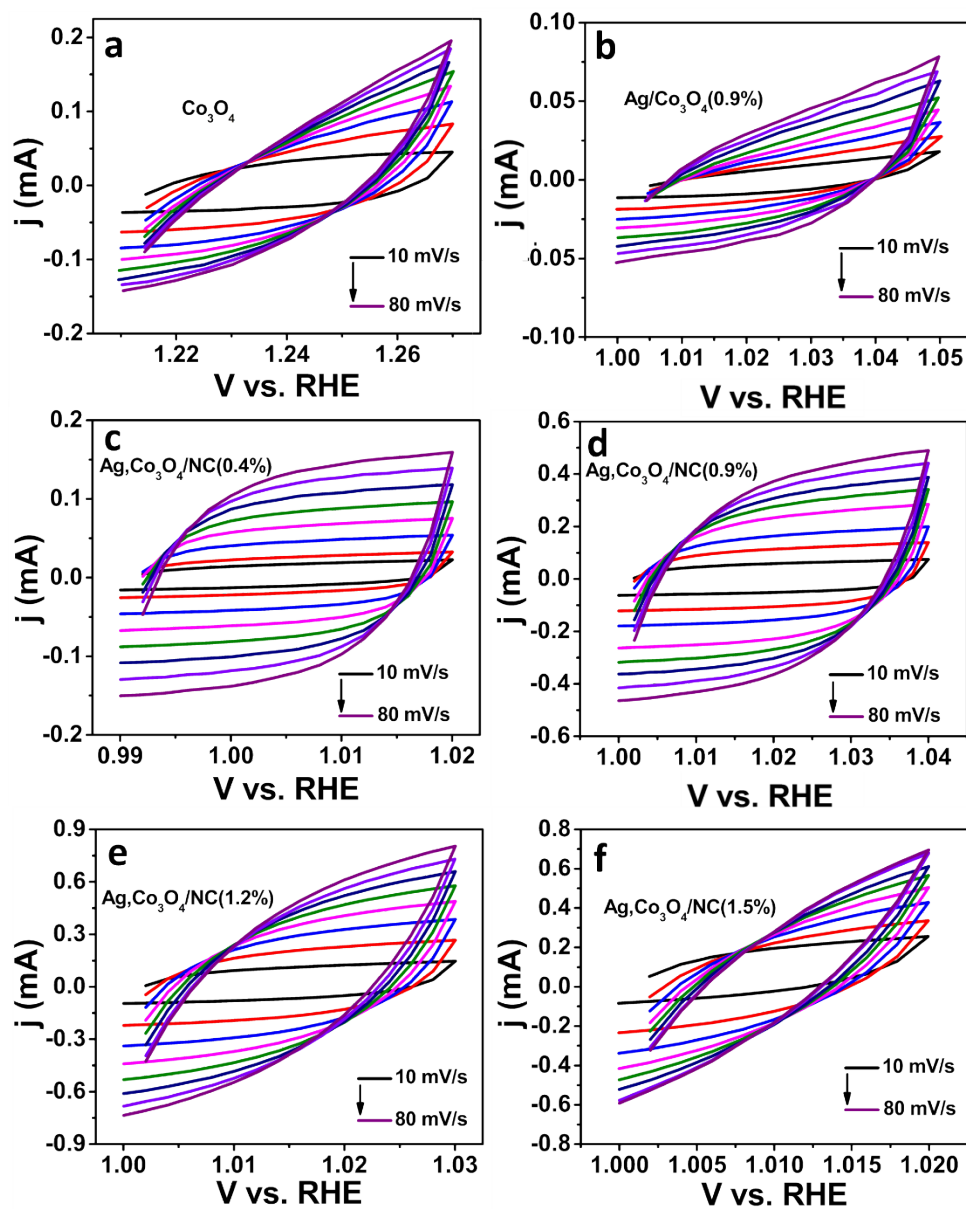

**Figure S13:** CV curves of all the synthesized materials in the non-faradic region

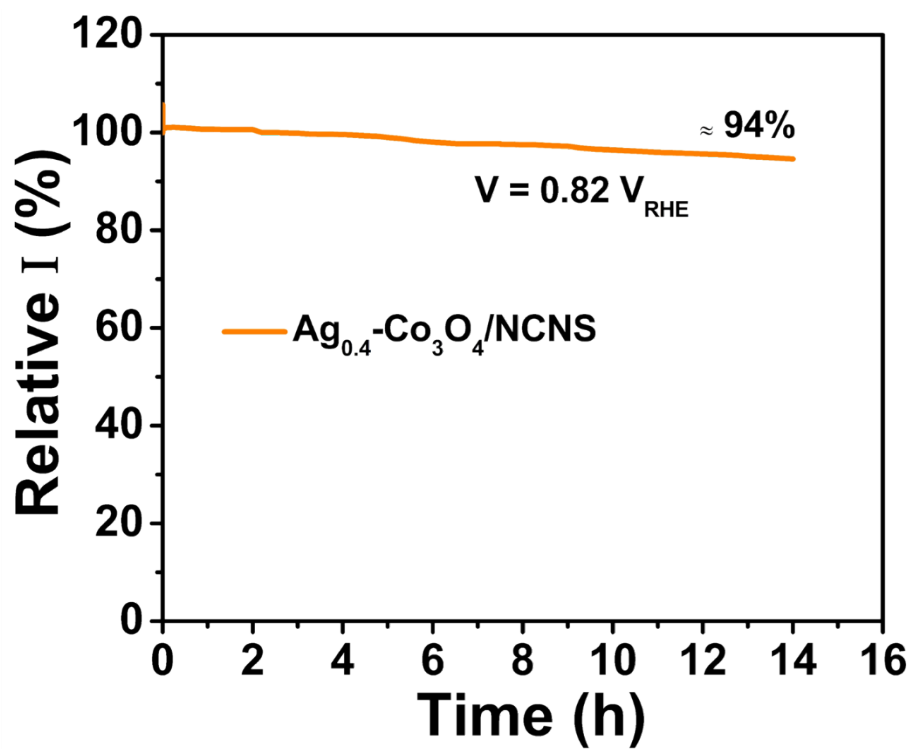

Figure S14: Chronoamperometric analysis of  $\text{Ag}_{0.4}\text{-Co}_3\text{O}_4/\text{NCNS}$  over 14 hrs.

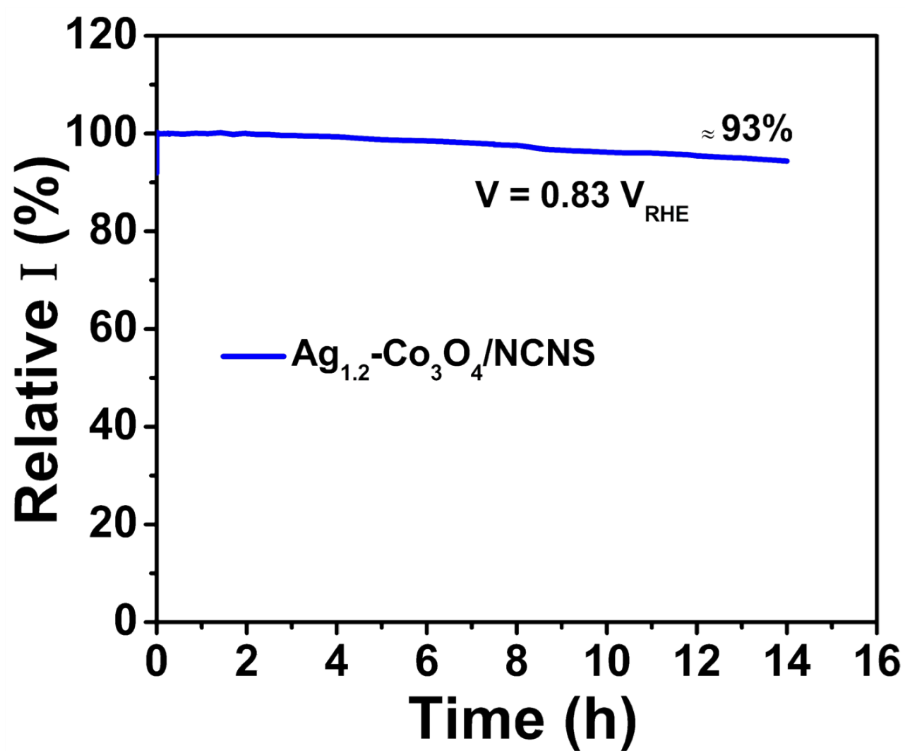

Figure S15: Chronoamperometric analysis of  $\text{Ag}_{1.2}\text{-Co}_3\text{O}_4/\text{NCNS}$  over 14 hrs.

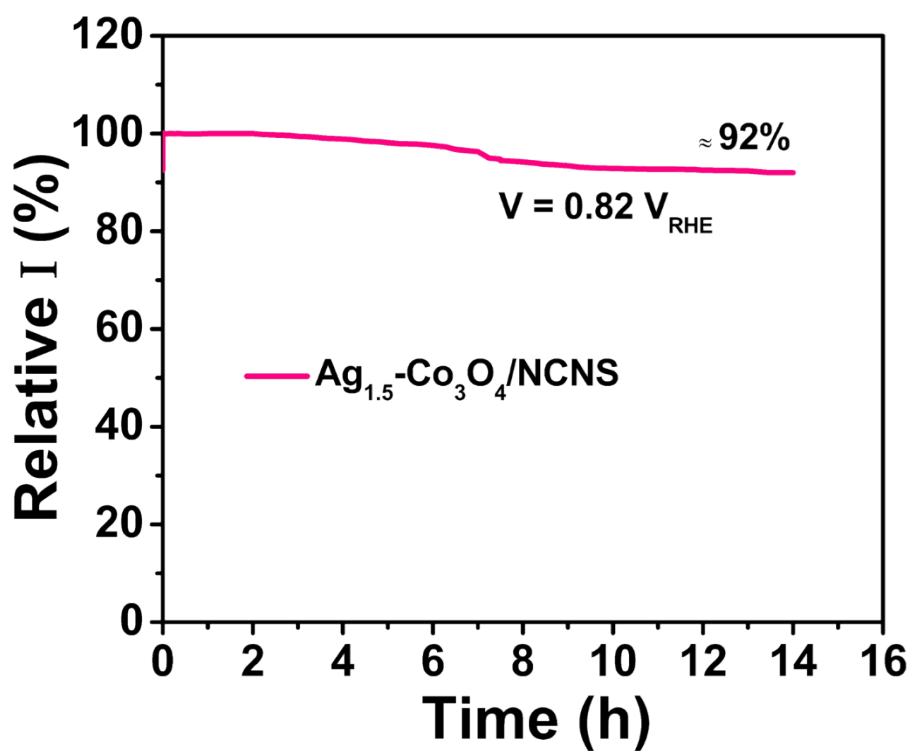

**Figure S16:** Chronoamperometric analysis of  $\text{Ag}_{1.5}\text{-Co}_3\text{O}_4/\text{NCNS}$  over 14 hrs.

**Table S2:** ECSA calculations of all the synthesized materials

| S.No | Catalyst                                            | $C_{dl}$ (mF) | ECSA ( $\text{cm}^2 \text{mg}^{-1}$ ) |
|------|-----------------------------------------------------|---------------|---------------------------------------|
| 1    | $\text{Co}_3\text{O}_4$                             | 0.192         | 48                                    |
| 2    | $\text{Ag}_{0.9}/\text{Co}_3\text{O}_4$             | 0.113         | 28                                    |
| 3    | $\text{Ag}_{0.4}\text{-Co}_3\text{O}_4/\text{NCNS}$ | 0.54          | 135                                   |
| 4    | $\text{Ag}_{0.9}\text{-Co}_3\text{O}_4/\text{NCNS}$ | 1.47          | 367                                   |
| 5    | $\text{Ag}_{1.2}\text{-Co}_3\text{O}_4/\text{NCNS}$ | 1.96          | 490                                   |
| 6    | $\text{Ag}_{1.5}\text{-Co}_3\text{O}_4/\text{NCNS}$ | 0.918         | 230                                   |

## References
